# Supplementary material for: pKa of alcohols dictates their reactivity with reduced uranium-substituted thiomolybdate clusters
Source: Royal Society of Chemistry journal article supplement (doi:10.1039/d4dt02803a), 2024-11-21
Supplement: d4dt02803a1.pdf [file d4dt02803a1.pdf]

## **Electronic Supporting Information**

### **pKa of Alcohols Dictate their Reactivity with Reduced Uranium-substituted Thiomolybdate Clusters**

Kamaless Patra, William W. Brennessel, and Ellen M. Matson\*

Department of Chemistry, University of Rochester, Rochester, New York 14627, United States

\* Corresponding author

## Supporting Information Table of Contents

|                                                                                                                                                                                                                                                                                                                                                                                                               |     |
|---------------------------------------------------------------------------------------------------------------------------------------------------------------------------------------------------------------------------------------------------------------------------------------------------------------------------------------------------------------------------------------------------------------|-----|
| <b>Table S1.</b> Crystallographic parameters for molecular structures of complexes for $(\text{Cp}^*_3\text{Mo}_3\text{S}_4)\text{Cp}^*\text{U}(\text{OMe})$ , $(\text{Cp}^*_3\text{Mo}_3\text{S}_4)\text{Cp}^*\text{U}(\text{OPh}^{\text{Cl}2})$ , $(\text{Cp}^*_3\text{Mo}_3\text{S}_4)\text{Cp}^*\text{U}(\text{OPh})_2$ , and $(\text{Cp}^*_3\text{Mo}_3\text{S}_4)\text{U}(\text{O}^t\text{Bu})_3$ ..... | S3  |
| <b>Figures S1.</b> $^1\text{H}$ NMR spectrum of $(\text{Cp}^*_3\text{Mo}_3\text{S}_4)\text{Cp}^*\text{U}(\text{OMe})$ in $\text{C}_6\text{D}_6$ .....                                                                                                                                                                                                                                                         | S4  |
| <b>Figures S2.</b> $^1\text{H}$ NMR characterization of the evolved $\text{H}_2$ gas from the reaction mixture of $(\text{Cp}^*_3\text{Mo}_3\text{S}_4)\text{UCp}^*$ and methanol in $\text{C}_6\text{D}_6$ .....                                                                                                                                                                                             | S4  |
| <b>Figures S3 and S4.</b> $^1\text{H}$ and $^2\text{H}$ NMR characterization of $(\text{Cp}^*_3\text{Mo}_3\text{S}_4)\text{Cp}^*\text{U}(\text{OCD}_3)$ .....                                                                                                                                                                                                                                                 | S5  |
| <b>Figure S5.</b> $^2\text{H}$ NMR characterization of the evolved $\text{D}_2$ gas from the reaction mixture of $(\text{Cp}^*_3\text{Mo}_3\text{S}_4)\text{UCp}^*$ and $\text{CD}_3\text{OD}$ in $\text{C}_6\text{H}_6$ .....                                                                                                                                                                                | S6  |
| <b>Figure S6.</b> $^1\text{H}$ NMR spectrum of the reaction mixture containing $(\text{Cp}^*_3\text{Mo}_3\text{S}_4)\text{UCp}^*$ and 1.1 equivalent of phenol in $\text{C}_6\text{D}_6$ .....                                                                                                                                                                                                                | S6  |
| <b>Figure S7.</b> $^1\text{H}$ NMR spectrum of $(\text{Cp}^*_3\text{Mo}_3\text{S}_4)\text{Cp}^*\text{U}(\text{OPh})_2$ in $\text{C}_6\text{D}_6$ .....                                                                                                                                                                                                                                                        | S7  |
| <b>Figure S8.</b> $^1\text{H}$ NMR spectrum of $(\text{Cp}^*_3\text{Mo}_3\text{S}_4)\text{Cp}^*\text{U}(\text{OPh})$ in $\text{C}_6\text{D}_6$ .....                                                                                                                                                                                                                                                          | S7  |
| <b>Figure S9.</b> $^1\text{H}$ NMR spectrum of $(\text{Cp}^*_3\text{Mo}_3\text{S}_4)\text{Cp}^*\text{U}(\text{OPh})_2$ obtained from the reaction of $(\text{Cp}^*_3\text{Mo}_3\text{S}_4)\text{Cp}^*\text{U}(\text{OPh})$ with 1 equivalent of phenol in $\text{C}_6\text{D}_6$ .....                                                                                                                        | S8  |
| <b>Figure S10.</b> $^1\text{H}$ NMR spectrum of the reaction mixture containing $(\text{Cp}^*_3\text{Mo}_3\text{S}_4)\text{UCp}^*$ and 2 equivalents methanol in toluene- $d_8$ .....                                                                                                                                                                                                                         | S8  |
| <b>Figure S11.</b> $^1\text{H}$ NMR spectrum of the reaction mixture containing $(\text{Cp}^*_3\text{Mo}_3\text{S}_4)\text{UCp}^*$ and 3 equivalents methanol in toluene- $d_8$ .....                                                                                                                                                                                                                         | S9  |
| <b>Figure S12.</b> $^1\text{H}$ NMR spectrum of $(\text{Cp}^*_3\text{Mo}_3\text{S}_4)\text{Cp}^*\text{U}(\text{OPh}^{\text{Cl}2})$ in $\text{C}_6\text{D}_6$ .....                                                                                                                                                                                                                                            | S9  |
| <b>Figure S13.</b> $^1\text{H}$ NMR spectrum of the reaction mixture of $(\text{Cp}^*_3\text{Mo}_3\text{S}_4)\text{UCp}^*$ with 1 equiv of <i>tert</i> -butanol in $\text{C}_6\text{D}_6$ .....                                                                                                                                                                                                               | S10 |
| <b>Figure S14.</b> $^1\text{H}$ NMR spectrum of the crude reaction mixture containing $(\text{Cp}^*_3\text{Mo}_3\text{S}_4)\text{UCp}^*$ and 3 equivalent of <i>tert</i> -butanol in $\text{C}_6\text{D}_6$ .....                                                                                                                                                                                             | S11 |
| <b>Figure S15.</b> $^1\text{H}$ NMR spectrum of the $(\text{Cp}^*_3\text{Mo}_3\text{S}_4)\text{U}(\text{O}^t\text{Bu})_3$ in $\text{C}_6\text{D}_6$ .....                                                                                                                                                                                                                                                     | S11 |
| <b>Figure S16.</b> $^1\text{H}$ NMR spectrum of the $(\text{Cp}^*_3\text{Mo}_3\text{S}_4)\text{Cp}^*\text{U}(\text{O}^t\text{Bu})$ in $\text{C}_6\text{D}_6$ .....                                                                                                                                                                                                                                            | S12 |
| <b>Figure S17.</b> Stacked $^1\text{H}$ NMR spectra of the reaction mixture containing $(\text{Cp}^*_3\text{Mo}_3\text{S}_4)\text{UCp}^*$ and 1 equivalent of <i>tert</i> -butanol with $(\text{Cp}^*_3\text{Mo}_3\text{S}_4)\text{Cp}^*\text{U}(\text{O}^t\text{Bu})$ in $\text{C}_6\text{D}_6$ .....                                                                                                        | S12 |
| <b>Figure S18.</b> $^1\text{H}$ NMR spectrum of the $(\text{Cp}^*_3\text{Mo}_3\text{S}_4)\text{Cp}^*\text{U}(\text{OC}(\text{CF}_3)_3)$ in $\text{C}_6\text{D}_6$ .....                                                                                                                                                                                                                                       | S13 |
| <b>Figure S19.</b> $^{19}\text{F}\{^1\text{H}\}$ NMR spectrum of the $(\text{Cp}^*_3\text{Mo}_3\text{S}_4)\text{Cp}^*\text{U}(\text{OC}(\text{CF}_3)_3)$ in $\text{C}_6\text{D}_6$ .....                                                                                                                                                                                                                      | S13 |

**Table S1:** Crystallographic parameters for molecular structures of complexes for  $(\text{Cp}^*_3\text{Mo}_3\text{S}_4)\text{Cp}^*\text{U}(\text{OMe})$ ,  $(\text{Cp}^*_3\text{Mo}_3\text{S}_4)\text{Cp}^*\text{U}(\text{OPh}^{\text{Cl}_2})$ ,  $(\text{Cp}^*_3\text{Mo}_3\text{S}_4)\text{Cp}^*\text{U}(\text{OPh})_2$  and  $(\text{Cp}^*_3\text{Mo}_3\text{S}_4)\text{U}(\text{O}^t\text{Bu})_3$ .

| Compound                               | $(\text{Cp}^*_3\text{Mo}_3\text{S}_4)\text{Cp}^*\text{U}(\text{OMe})$                                                                                                         | $(\text{Cp}^*_3\text{Mo}_3\text{S}_4)\text{Cp}^*\text{U}(\text{OPh}^{\text{Cl}_2})$                                                                                         | $(\text{Cp}^*_3\text{Mo}_3\text{S}_4)\text{Cp}^*\text{U}(\text{OPh})_2$                                                                                               | $(\text{Cp}^*_3\text{Mo}_3\text{S}_4)\text{U}(\text{O}^t\text{Bu})_3$                                                                                                         |
|----------------------------------------|-------------------------------------------------------------------------------------------------------------------------------------------------------------------------------|-----------------------------------------------------------------------------------------------------------------------------------------------------------------------------|-----------------------------------------------------------------------------------------------------------------------------------------------------------------------|-------------------------------------------------------------------------------------------------------------------------------------------------------------------------------|
| Empirical formula                      | $\text{C}_{41}\text{H}_{63}\text{Mo}_3\text{OS}_4\text{U}$                                                                                                                    | $\text{C}_{56.50}\text{H}_{75}\text{Cl}_2\text{Mo}_3\text{O S}_4\text{U}$                                                                                                   | $\text{C}_{58}\text{H}_{70}\text{D}_6\text{Mo}_3\text{O}_2\text{S}_4\text{U}$                                                                                         | $\text{C}_{42}\text{H}_{72}\text{Mo}_3\text{O}_3\text{S}_4\text{U}$                                                                                                           |
| Formula weight                         | 1226.00                                                                                                                                                                       | 1495.15                                                                                                                                                                     | 1465.31                                                                                                                                                               | 1279.08                                                                                                                                                                       |
| Temperature                            | 100.00(10) K                                                                                                                                                                  | 100.00(10) K                                                                                                                                                                | 100.00(10) K                                                                                                                                                          | 100.00(10) K                                                                                                                                                                  |
| Wavelength                             | 1.54184 Å                                                                                                                                                                     | 1.54184 Å                                                                                                                                                                   | 1.54184 Å                                                                                                                                                             | 1.54184 Å                                                                                                                                                                     |
| Crystal system                         | monoclinic                                                                                                                                                                    | monoclinic                                                                                                                                                                  | orthorhombic                                                                                                                                                          | monoclinic                                                                                                                                                                    |
| Space group                            | $P2_1/n$                                                                                                                                                                      | $P2_1/c$                                                                                                                                                                    | $P2_12_12_1$                                                                                                                                                          | $P2_1/n$                                                                                                                                                                      |
| Unit cell dimensions                   | $a = 11.17593(8) \text{ \AA}$<br>$b = 19.26021(16) \text{ \AA}$<br>$c = 20.25129(16) \text{ \AA}$<br>$\alpha = 90^\circ$<br>$\beta = 99.7002(7)^\circ$<br>$\gamma = 90^\circ$ | $a = 11.11244(9) \text{ \AA}$<br>$b = 20.41551(16) \text{ \AA}$<br>$c = 24.6678(2) \text{ \AA}$<br>$\alpha = 90^\circ$<br>$\gamma = 90^\circ$<br>$\beta = 97.3244(8)^\circ$ | $a = 10.99181(6) \text{ \AA}$<br>$b = 20.28569(11) \text{ \AA}$<br>$c = 24.73170(15) \text{ \AA}$<br>$\alpha = 90^\circ$<br>$\beta = 90^\circ$<br>$\gamma = 90^\circ$ | $a = 10.97728(7) \text{ \AA}$<br>$b = 17.85746(11) \text{ \AA}$<br>$c = 24.61165(16) \text{ \AA}$<br>$\alpha = 90^\circ$<br>$\beta = 96.2794(6)^\circ$<br>$\gamma = 90^\circ$ |
| Volume / Å <sup>3</sup>                | 4296.78(6)                                                                                                                                                                    | 5550.63(8)                                                                                                                                                                  | 5514.59(5)                                                                                                                                                            | 4795.59(5)                                                                                                                                                                    |
| Z                                      | 4                                                                                                                                                                             | 4                                                                                                                                                                           | 4                                                                                                                                                                     | 4                                                                                                                                                                             |
| Crystal Size                           | 0.103 x 0.053 x 0.027 mm <sup>3</sup>                                                                                                                                         | 0.169 x 0.028 x 0.019 mm <sup>3</sup>                                                                                                                                       | 0.138 x 0.038 x 0.015 mm <sup>3</sup>                                                                                                                                 | 0.127 x 0.065 x 0.011 mm <sup>3</sup>                                                                                                                                         |
| Reflections collected                  | 62579                                                                                                                                                                         | 92991                                                                                                                                                                       | 63887                                                                                                                                                                 | 80766                                                                                                                                                                         |
| Independent reflections                | 9171 [R(int) = 0.0510]                                                                                                                                                        | 11963 [R(int) = 0.0516]                                                                                                                                                     | 11807 [R(int) = 0.0481]                                                                                                                                               | 10319 [R(int) = 0.0533]                                                                                                                                                       |
| Completeness ( $\theta = 74.5^\circ$ ) | 99.7%                                                                                                                                                                         | 99.9%                                                                                                                                                                       | 99.9%                                                                                                                                                                 | 99.9%                                                                                                                                                                         |
| Goodness-of-fit on $F^2$               | 1.042                                                                                                                                                                         | 1.052                                                                                                                                                                       | 1.057                                                                                                                                                                 | 1.025                                                                                                                                                                         |
| Final R indices [I > 2σ(I)]            | R1 = 0.0457, wR2 = 0.1110                                                                                                                                                     | R1 = 0.0286, wR2 = 0.0704                                                                                                                                                   | R1 = 0.0249, wR2 = 0.0541                                                                                                                                             | R1 = 0.0249, wR2 = 0.0581                                                                                                                                                     |
| Largest diff. peak and hole            | 3.004 and -3.149 e.Å <sup>-3</sup>                                                                                                                                            | 4.102 and -2.074 e.Å <sup>-3</sup>                                                                                                                                          | 1.454 and -0.874 e.Å <sup>-3</sup>                                                                                                                                    | 1.219 and -1.055 e.Å <sup>-3</sup>                                                                                                                                            |

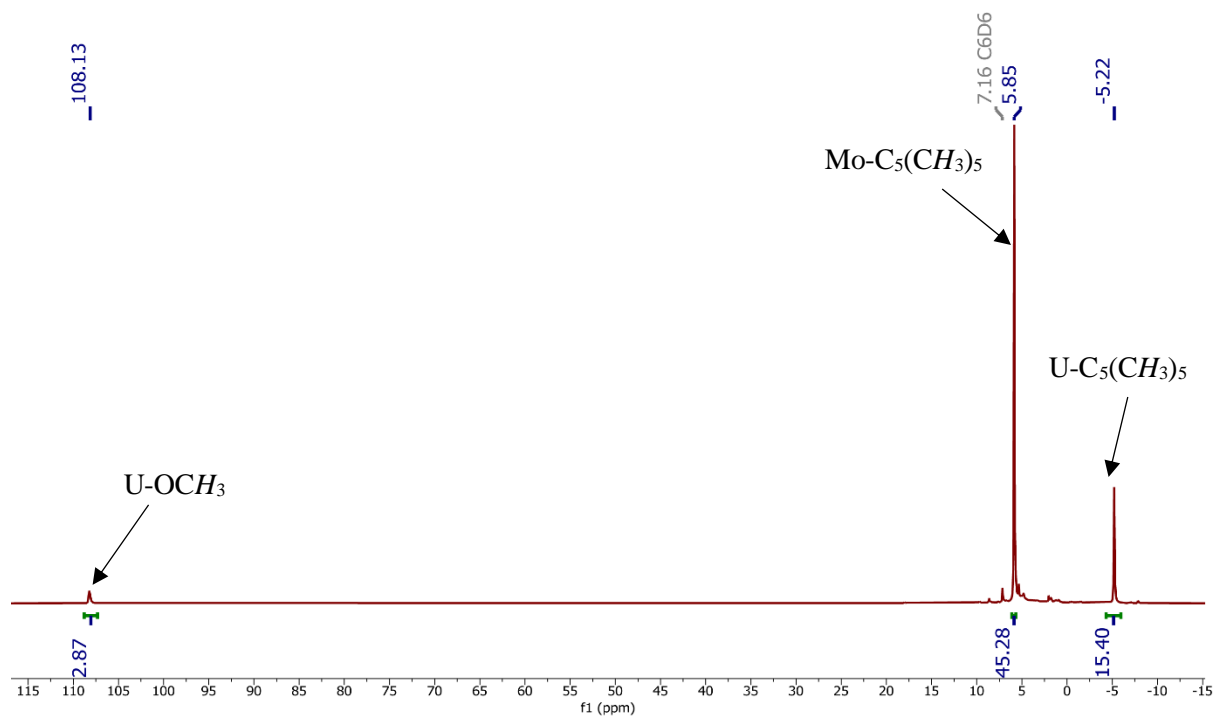

**Figure S1.**  $^1\text{H}$  NMR spectrum (400 MHz) of  $(\text{Cp}^*_3\text{Mo}_3\text{S}_4)\text{Cp}^*\text{U}(\text{OMe})$  in  $\text{C}_6\text{D}_6$ .

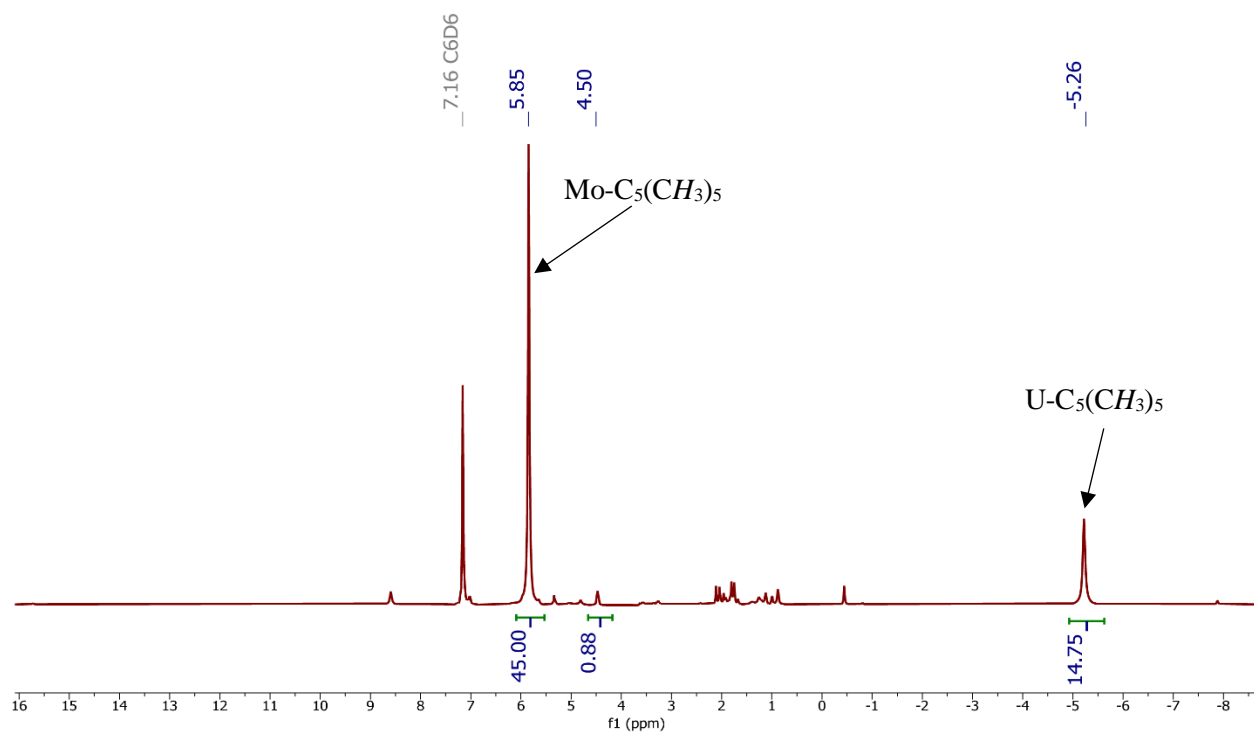

**Figure S2.**  $^1\text{H}$  NMR spectrum (400 MHz) of  $(\text{Cp}^*_3\text{Mo}_3\text{S}_4)\text{UCp}^*$  and  $\text{C}_6\text{D}_6$  solution having 1 equivalent of methanol in  $\text{C}_6\text{D}_6$ . [Signals  $\delta = 4.50$  ppm is assigned to  $\text{H}_2$  (~88% yield).]

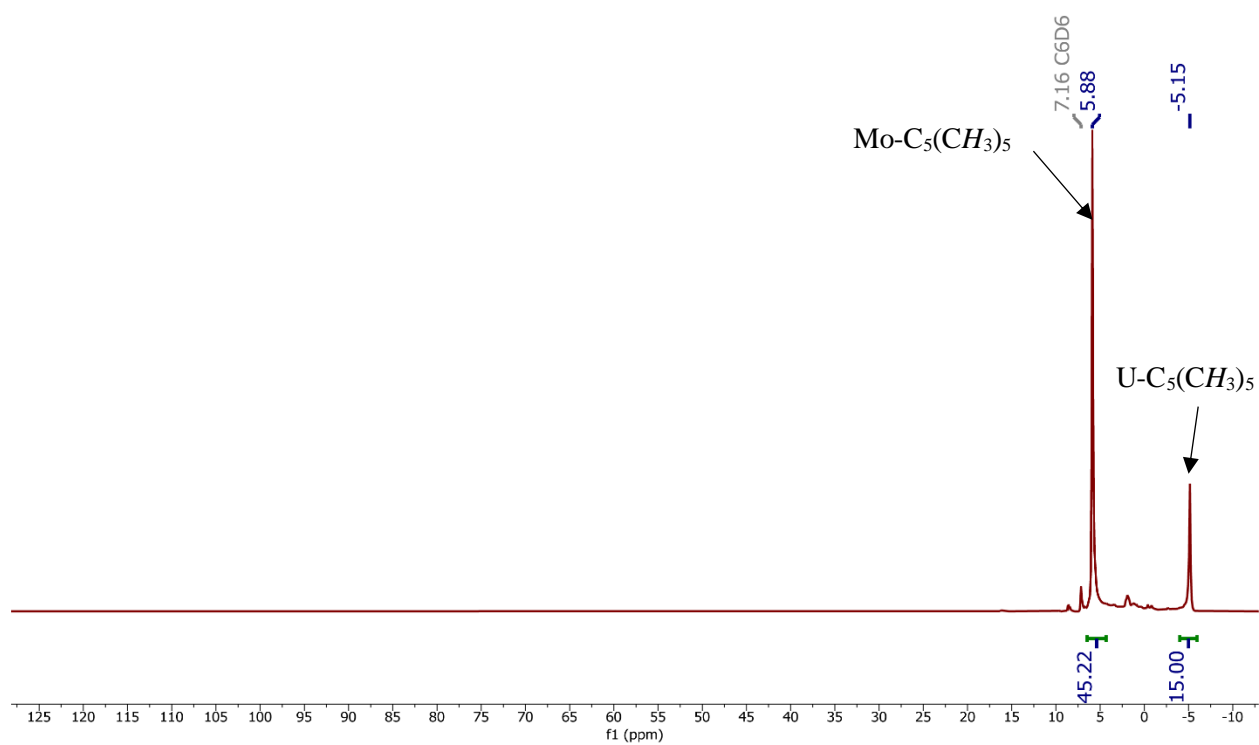

**Figure S3.**  $^1\text{H}$  NMR spectrum (400 MHz) of  $(\text{Cp}^*_3\text{Mo}_3\text{S}_4)\text{Cp}^*\text{U}(\text{OCD}_3)$  in  $\text{C}_6\text{D}_6$ .

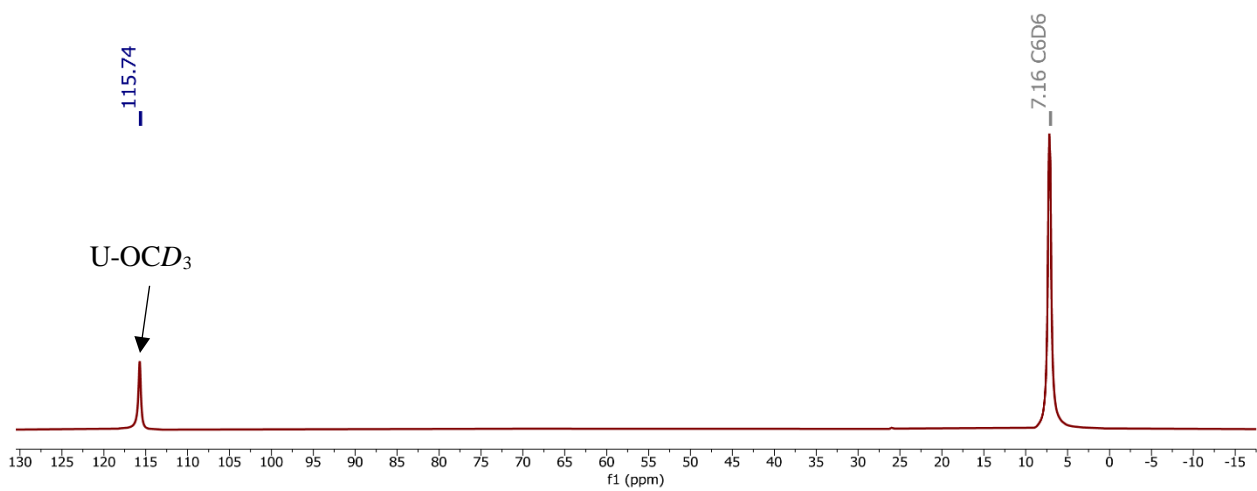

**Figure S4.**  $^2\text{H}$  NMR spectrum (400 MHz) of  $(\text{Cp}^*_3\text{Mo}_3\text{S}_4)\text{Cp}^*\text{U}(\text{OCD}_3)$  in  $\text{C}_6\text{H}_6$  [The signal at 115.74 ppm is attributed to the  $-\text{OCD}_3$ ].

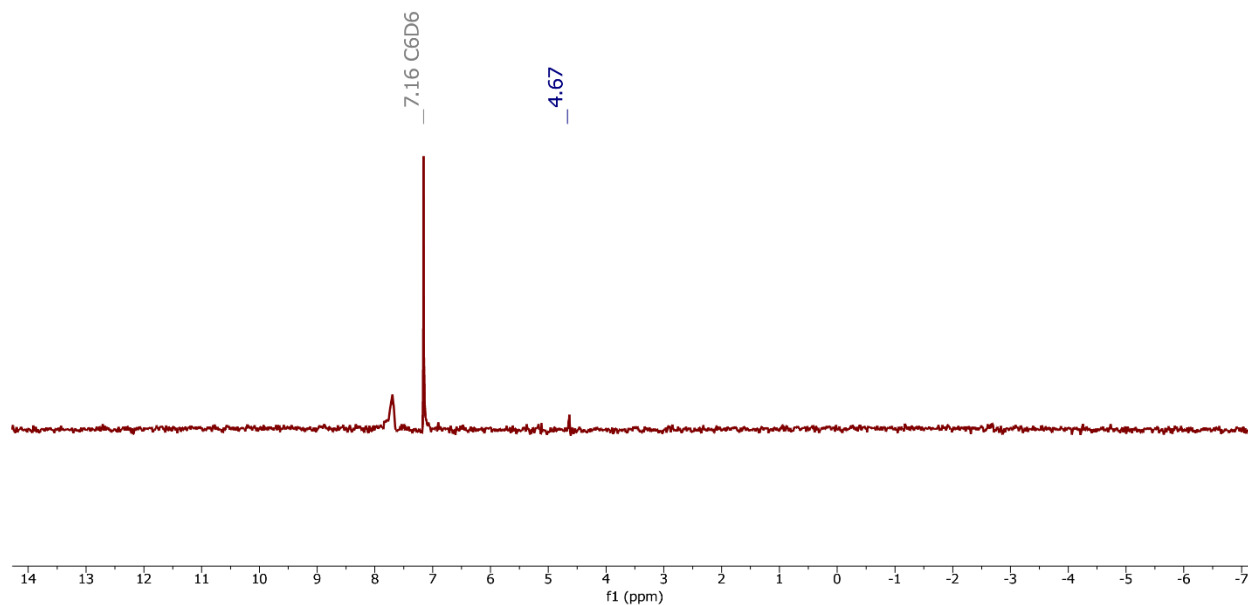

**Figure S5.**  $^2\text{H}$  NMR spectrum (400 MHz) of the reaction mixture containing a  $\text{C}_6\text{H}_6$  solution of  $(\text{Cp}^*_3\text{Mo}_3\text{S}_4)\text{UCp}^*$  and a  $\text{C}_6\text{H}_6$  solution with slightly more than 1 equivalent of  $\text{CD}_3\text{OD}$  [ $\text{C}_6\text{D}_6$  was added as an internal reference;  $\delta = 4.67$  ppm is assigned to  $\text{D}_2$ ].

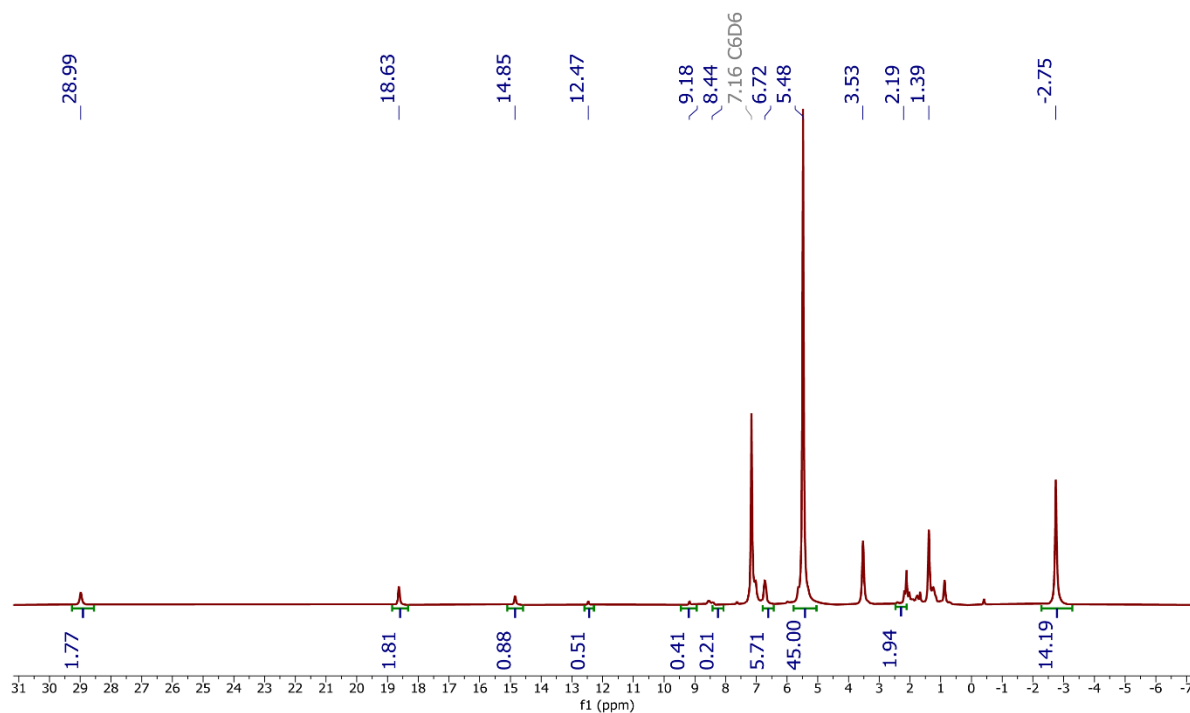

**Figure S6.**  $^1\text{H}$  NMR spectrum (400 MHz) of the reaction mixture containing  $(\text{Cp}^*_3\text{Mo}_3\text{S}_4)\text{UCp}^*$  and  $\sim 1.1$  equivalent of phenol in  $\text{C}_6\text{D}_6$ . Signals at 28.99, 18.63, 14.85, 5.48 and -2.75 ppm correspond to  $(\text{Cp}^*_3\text{Mo}_3\text{S}_4)\text{Cp}^*\text{U}(\text{OPh})$ , whereas signals at 12.47, 9.18, 8.44, 6.72 and 2.19 ppm correspond to  $(\text{Cp}^*_3\text{Mo}_3\text{S}_4)\text{Cp}^*\text{U}(\text{OPh})_2$ .

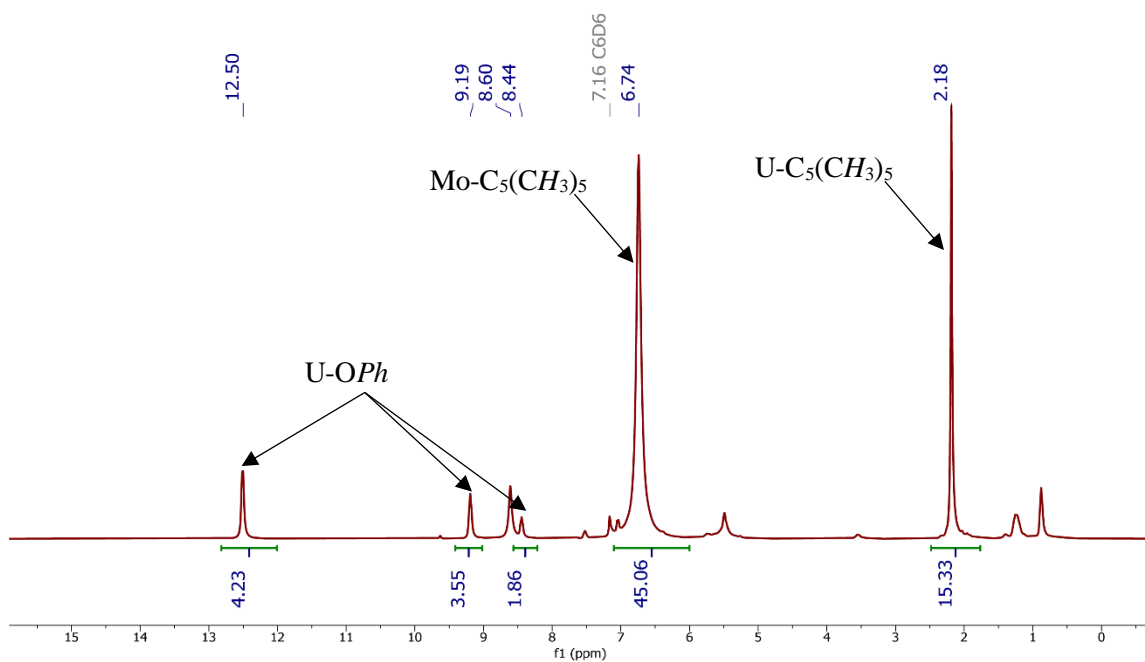

**Figure S7.**  $^1\text{H}$  NMR spectrum (400 MHz) of  $(\text{Cp}^*_3\text{Mo}_3\text{S}_4)\text{Cp}^*\text{U}(\text{OPh})_2$  in  $\text{C}_6\text{D}_6$ .

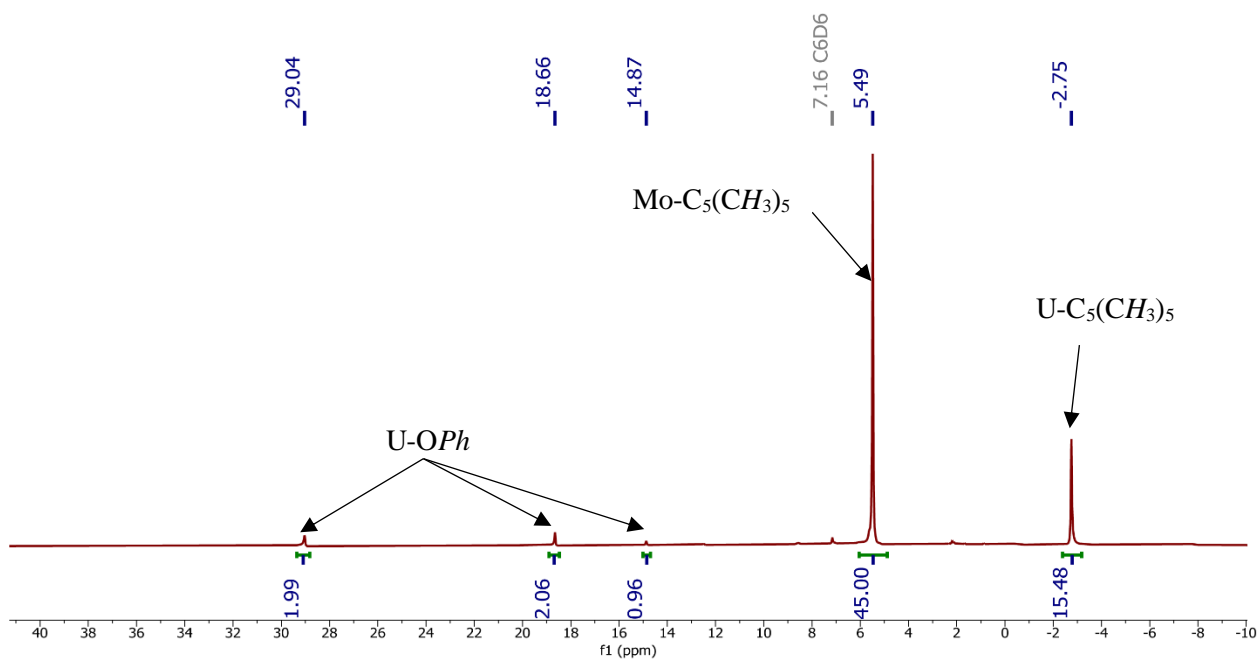

**Figure S8.**  $^1\text{H}$  NMR spectrum (400 MHz) of  $(\text{Cp}^*_3\text{Mo}_3\text{S}_4)\text{Cp}^*\text{U}(\text{OPh})$  in  $\text{C}_6\text{D}_6$ .

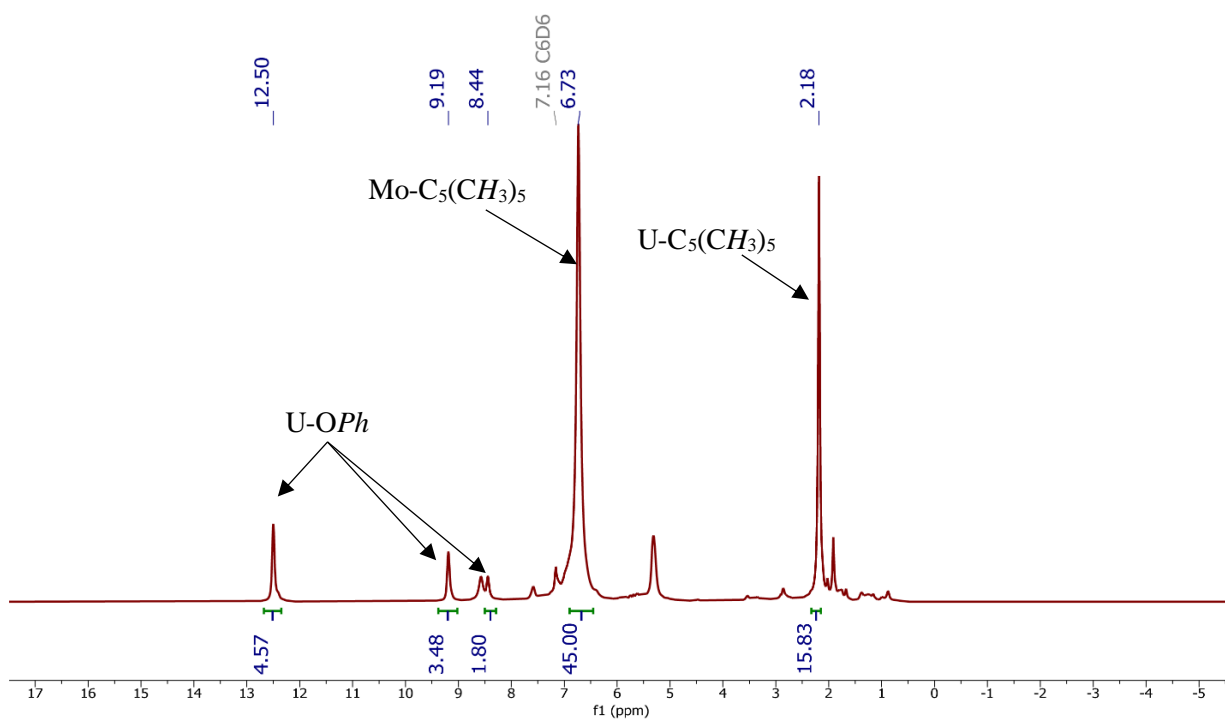

**Figure S9.**  $^1\text{H}$  NMR spectrum (400 MHz) of  $(\text{Cp}^*_3\text{Mo}_3\text{S}_4)\text{Cp}^*\text{U}(\text{OPh})_2$  obtained from the reaction of  $(\text{Cp}^*_3\text{Mo}_3\text{S}_4)\text{Cp}^*\text{U}(\text{OPh})$  with 1 equivalent of phenol in  $\text{C}_6\text{D}_6$ .

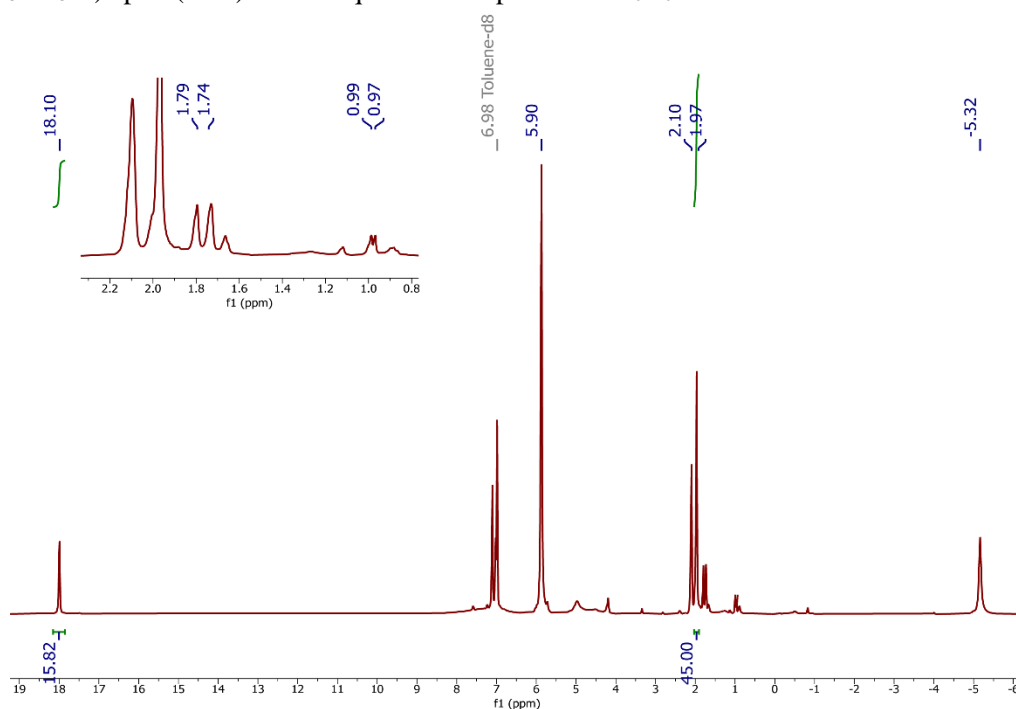

**Figure S10.**  $^1\text{H}$  NMR spectrum (400 MHz) (with slow relaxation time) of the reaction mixture containing  $(\text{Cp}^*_3\text{Mo}_3\text{S}_4)\text{UCp}^*$  and 2 equivalents methanol. (The signals at 18.10 and 1.97 ppm are assigned to  $[(\text{Cp}^*_3\text{Mo}_3\text{S}_4)^+\text{U}(\text{OMe})_5^-]$  or  $[(\text{Cp}^*_3\text{Mo}_3\text{S}_4)\text{U}(\text{OMe})_5]$ ; signals at 5.90 and -5.32 correspond to  $[(\text{Cp}^*_3\text{Mo}_3\text{S}_4)\text{Cp}^*\text{U}(\text{OMe})]$ ; and signals at 0.98, 1.72 and 1.79 ppm assigned to  $\text{Cp}^*\text{H}$ ).



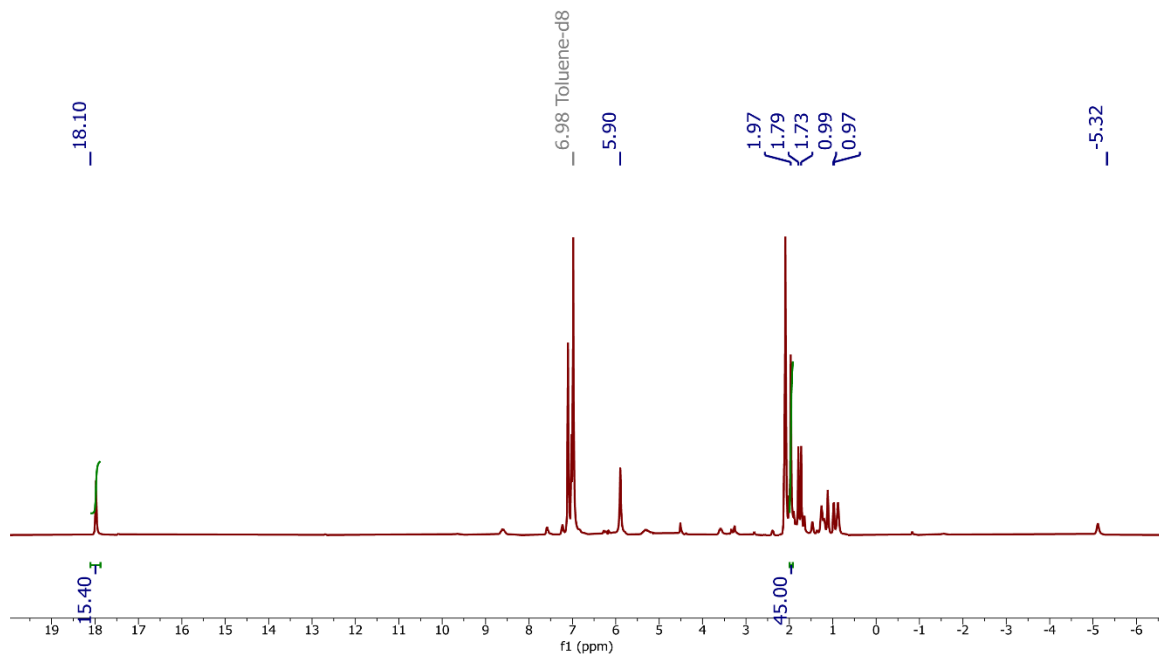

**Figure S11.**  $^1\text{H}$  NMR spectrum (400 MHz) of the reaction mixture containing  $(\text{Cp}^*_3\text{Mo}_3\text{S}_4)\text{UCp}^*$  and 3 equivalents methanol.

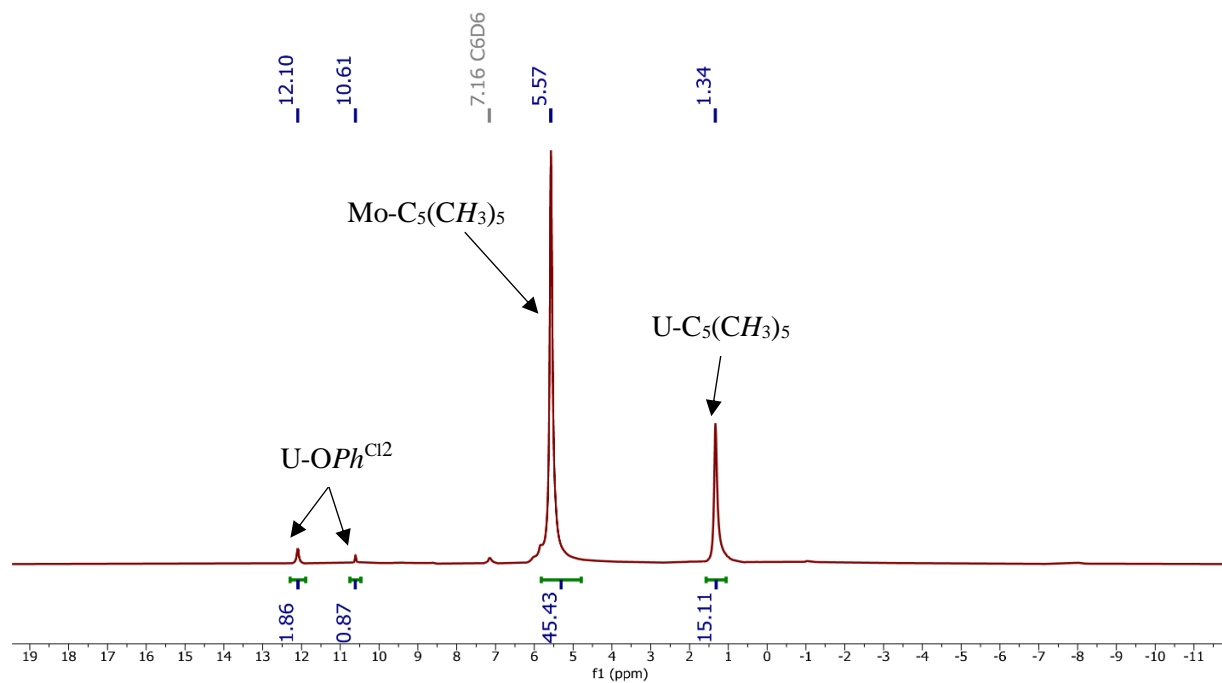

**Figure S12.**  $^1\text{H}$  NMR spectrum (400 MHz) of  $(\text{Cp}^*_3\text{Mo}_3\text{S}_4)\text{Cp}^*\text{U}(\text{OPh}^{\text{Cl}_2})$  in  $\text{C}_6\text{D}_6$ .

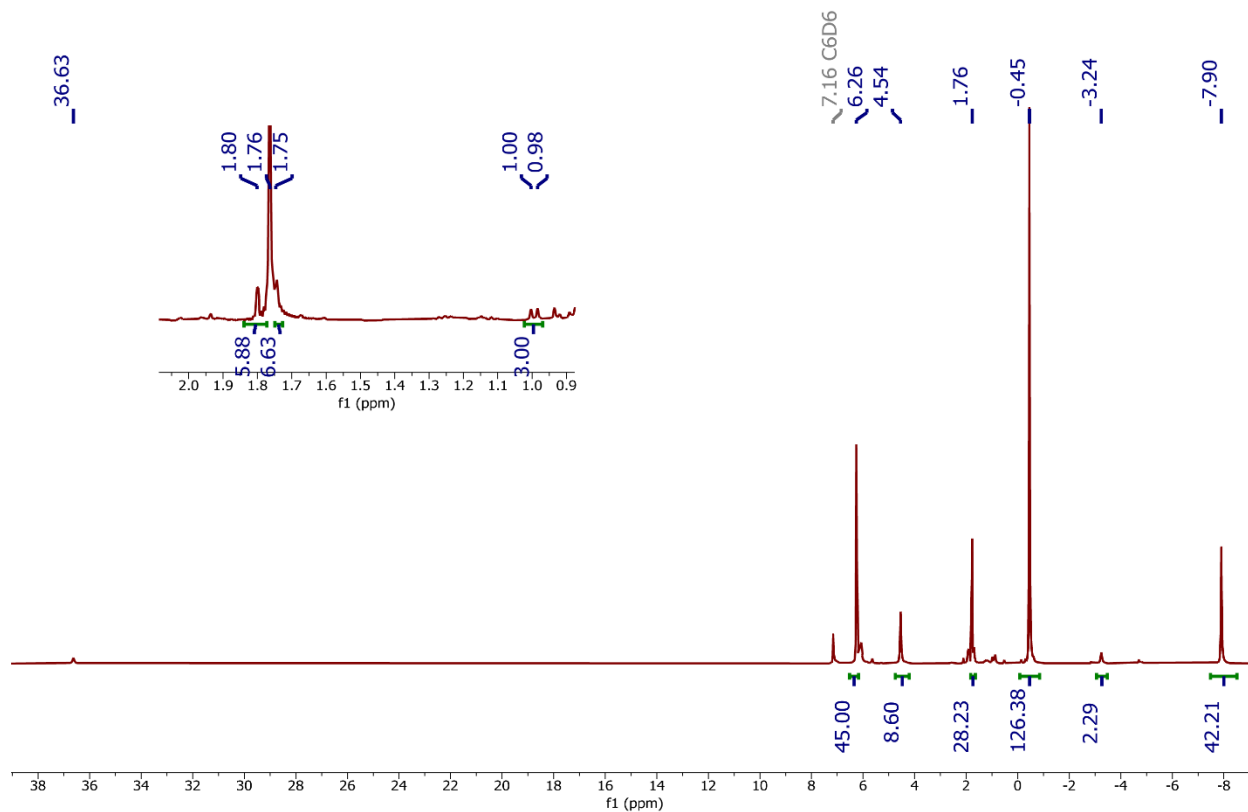

**Figure S13.**  $^1\text{H}$  NMR spectrum (400 MHz) (with slow relaxation time) of the reaction mixture containing  $(\text{Cp}^*_3\text{Mo}_3\text{S}_4)\text{UCp}^*$  and 1 equivalent of *tert*-butanol in  $\text{C}_6\text{D}_6$ . The signals at 6.26, and 1.76 ppm correspond to  $(\text{Cp}^*_3\text{Mo}_3\text{S}_4)\text{U}(\text{O}^t\text{Bu})_3$ ; signals at 4.54, -3.24, and 36.63 ppm correspond to proposed  $(\text{Cp}^*_3\text{Mo}_3\text{S}_4)\text{Cp}^*\text{U}(\text{O}^t\text{Bu})$  ( $(\text{Cp}^*_3\text{Mo}_3\text{S}_4)\text{U}(\text{O}^t\text{Bu})_3 : (\text{Cp}^*_3\text{Mo}_3\text{S}_4)\text{Cp}^*\text{U}(\text{O}^t\text{Bu}) \sim 5:1$ ) (see figure S20 for the  $^1\text{H}$  NMR spectrum of pure  $(\text{Cp}^*_3\text{Mo}_3\text{S}_4)\text{Cp}^*\text{U}(\text{O}^t\text{Bu})$ ); signals at 1.80, 1.75, and 0.99 ppm correspond  $\text{Cp}^*\text{H}$ ; signals at -0.45 and -7.90 ppm correspond to  $(\text{Cp}^*_3\text{Mo}_3\text{S}_4)\text{UCp}^*$ .

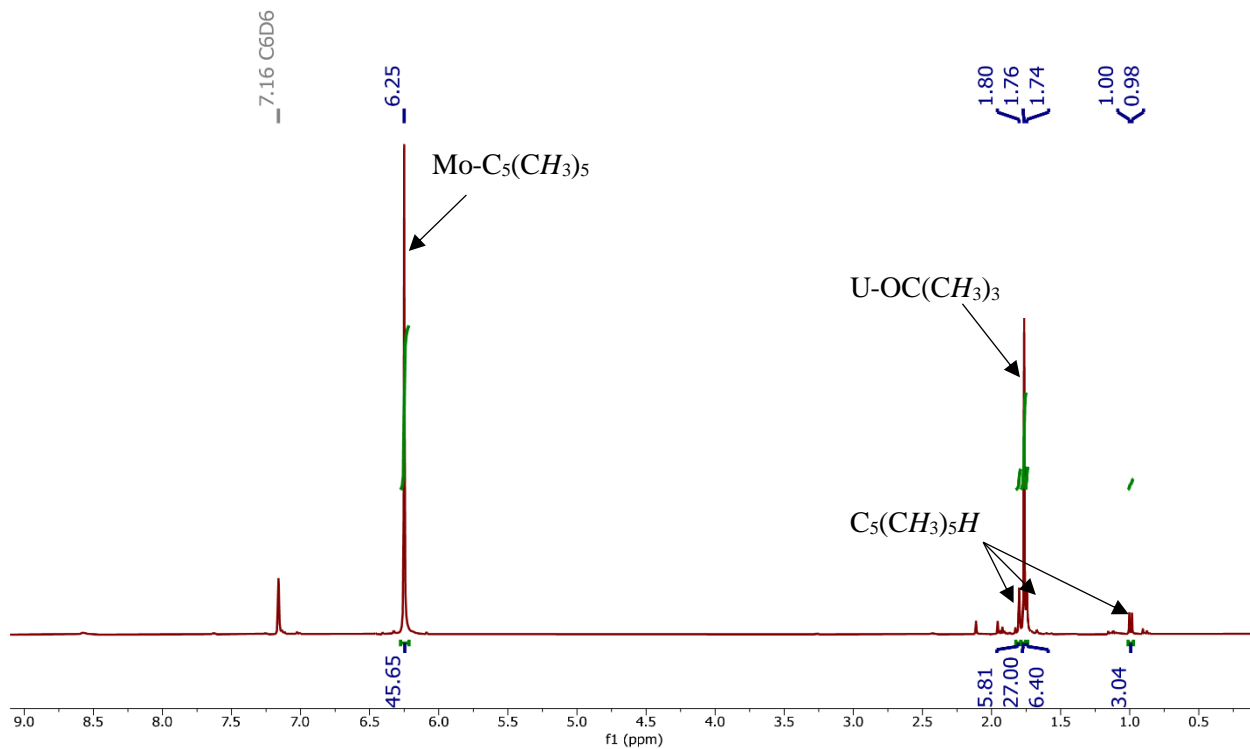

**Figure S14.**  $^1\text{H}$  NMR spectrum (400 MHz) (with slow relaxation time) of the crude reaction mixture containing  $(\text{Cp}^*_3\text{Mo}_3\text{S}_4)\text{UCp}^*$  and 3 equivalent of *tert*-butanol in  $\text{C}_6\text{D}_6$  [products:  $(\text{Cp}^*_3\text{Mo}_3\text{S}_4)\text{U}(\text{O}^t\text{Bu})_3$  and  $\text{Cp}^*\text{H}$ ].

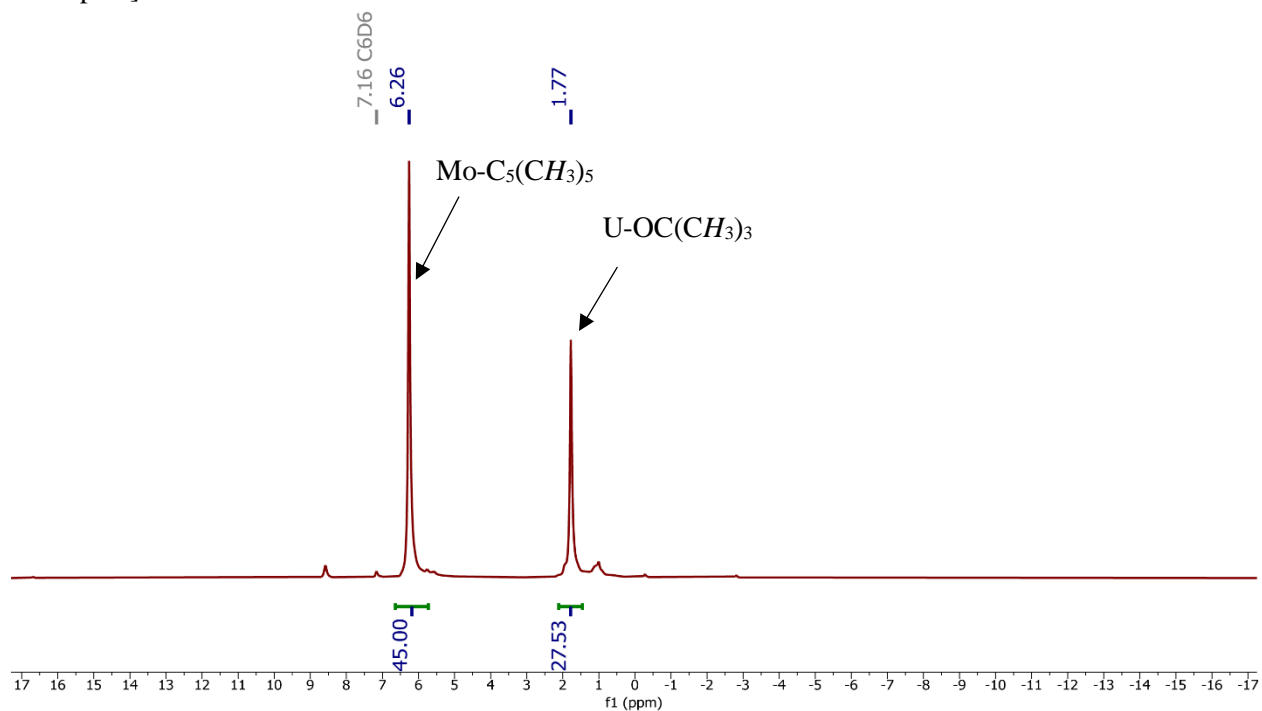

**Figure S15.**  $^1\text{H}$  NMR spectrum (500 MHz) of the  $(\text{Cp}^*_3\text{Mo}_3\text{S}_4)\text{U}(\text{O}^t\text{Bu})_3$  in  $\text{C}_6\text{D}_6$ .

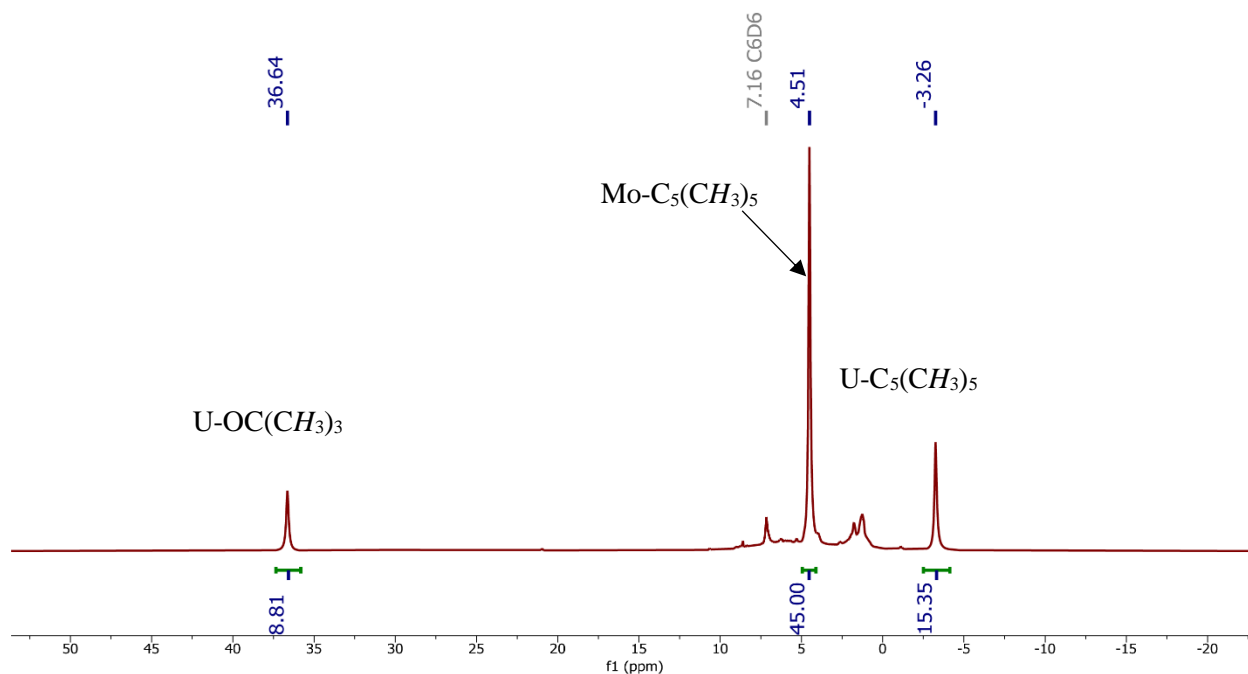

**Figure S16.**  $^1\text{H}$  NMR spectrum (500 MHz) of  $(\text{Cp}^*_3\text{Mo}_3\text{S}_4)\text{Cp}^*\text{U}(\text{O}'\text{Bu})$  in  $\text{C}_6\text{D}_6$ .

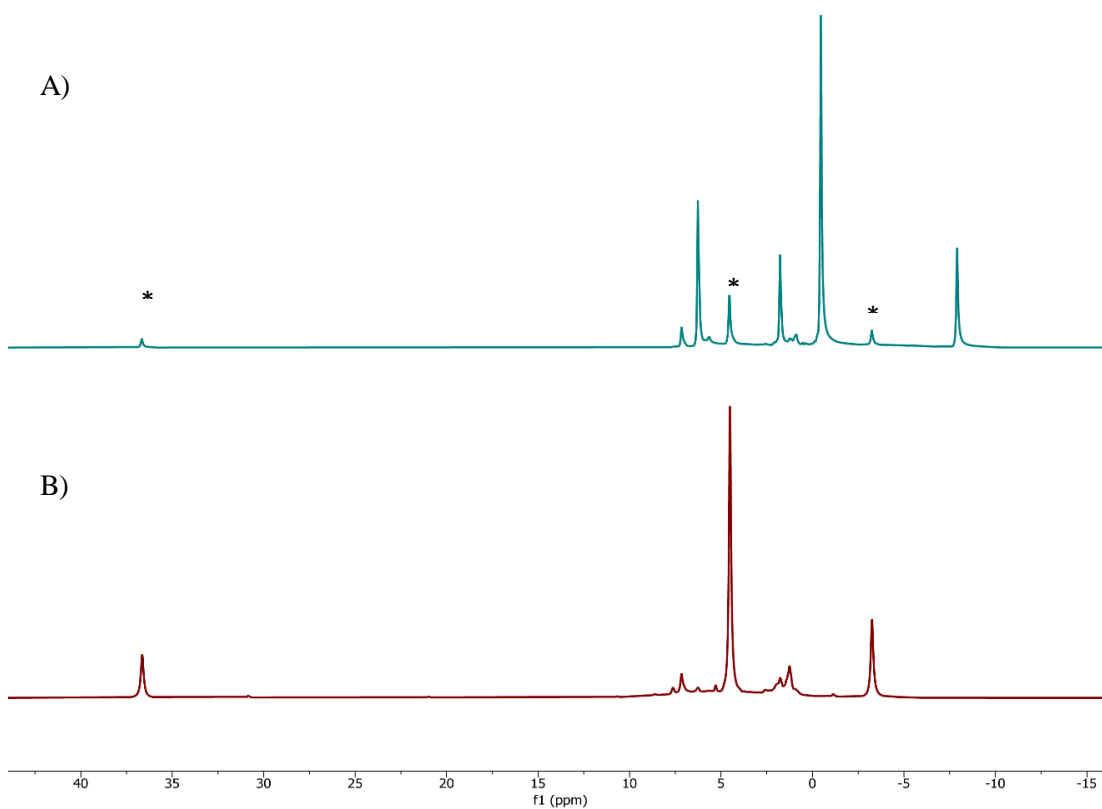

**Figure S17.** Stacked  $^1\text{H}$  NMR spectra (500 MHz) of A) the reaction mixture containing  $(\text{Cp}^*_3\text{Mo}_3\text{S}_4)\text{UCp}^*$  and 1 equivalent of *tert*-butanol and B)  $(\text{Cp}^*_3\text{Mo}_3\text{S}_4)\text{Cp}^*\text{U}(\text{O}'\text{Bu})$  in  $\text{C}_6\text{D}_6$  [\* signals represent the minor component  $(\text{Cp}^*_3\text{Mo}_3\text{S}_4)\text{Cp}^*\text{U}(\text{O}'\text{Bu})$  in the reaction mixture (A)].

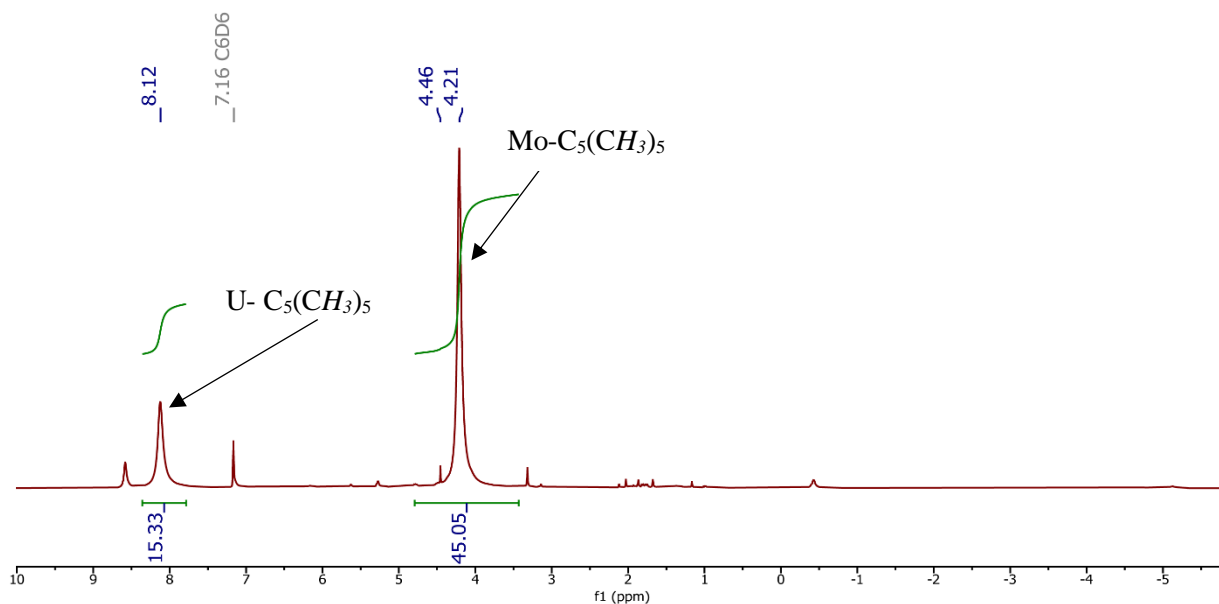

**Figure S18.**  $^1\text{H}$  NMR spectrum (400 MHz) of  $(\text{Cp}^*_3\text{Mo}_3\text{S}_4)\text{Cp}^*\text{U}(\text{OC}(\text{CF}_3)_3)$  in  $\text{C}_6\text{D}_6$  (The signal at 4.46 ppm is assigned to  $\text{H}_2$ ).

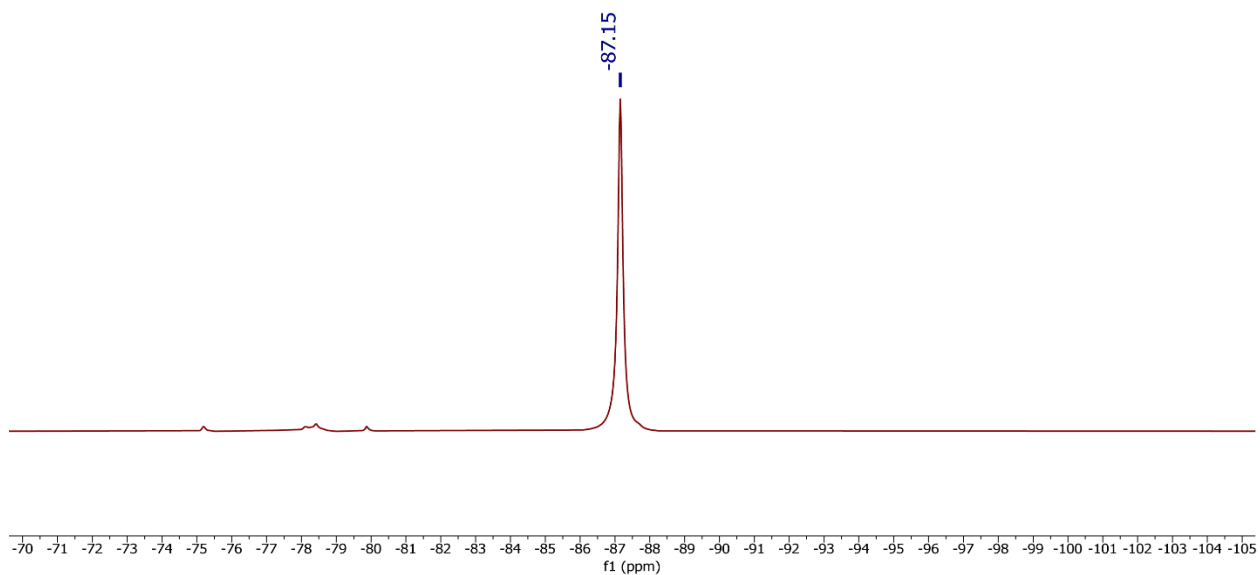

**Figure S19.**  $^{19}\text{F}\{^1\text{H}\}$  NMR spectrum of the  $(\text{Cp}^*_3\text{Mo}_3\text{S}_4)\text{Cp}^*\text{U}(\text{OC}(\text{CF}_3)_3)$  in  $\text{C}_6\text{D}_6$ .
